# Supplementary material for: Estimation of hydraulic conductivity functions in karst regions by particle swarm optimization with application to lake Vrana, Croatia
Source: Copernicus journal article supplement (doi:10.5194/hess-2022-253), 2022-08-15

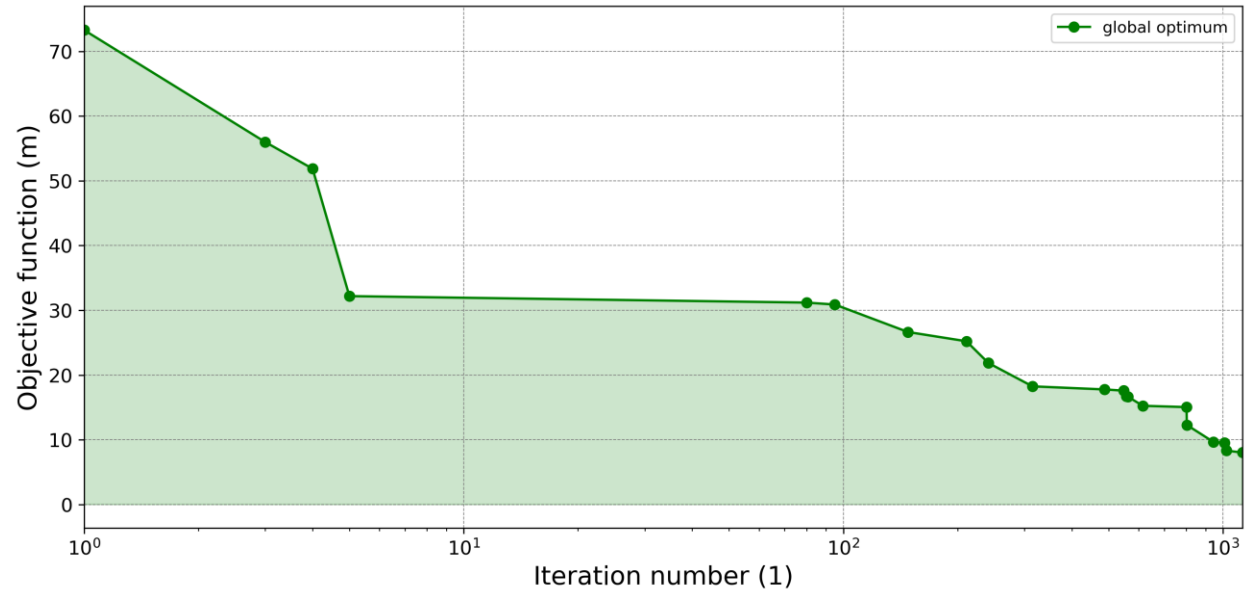

Supplement: Supplementary file [file hess-2022-253-AC3-supplement.pdf]
